# Supplementary material
Source: Research Square preprint supplement (doi:10.21203/rs.3.rs-9232521/v1)
Supplement: Supplementary file 1 [file 587b2f579899d73ba93f93fc.pdf]

*Supplementary Information for*

**Detecting regional deep-ocean steric changes remains challenging with sea level budget analyses**

**Yang Zhang<sup>1,2\*</sup>, Xinfeng Liang<sup>1\*</sup>, Don P. Chambers<sup>3</sup>, and Igor Yashayaev<sup>4</sup>**

<sup>1</sup>School of Marine Science and Policy, University of Delaware, Lewes, Delaware, USA.

<sup>2</sup>Scripps Institution of Oceanography, University of California, San Diego, La Jolla, CA, USA

<sup>3</sup>College of Marine Science, University of South Florida, St. Petersburg, Florida, USA.

<sup>4</sup>Bedford Institute of Oceanography, Fisheries and Oceans Canada, Dartmouth, N.S., Canada.

Corresponding authors: Yang Zhang (yaz121@ucsd.edu), Xinfeng Liang (xfliang@udel.edu)

**This PDF file includes:**

Supplementary Figs. 1 to 3

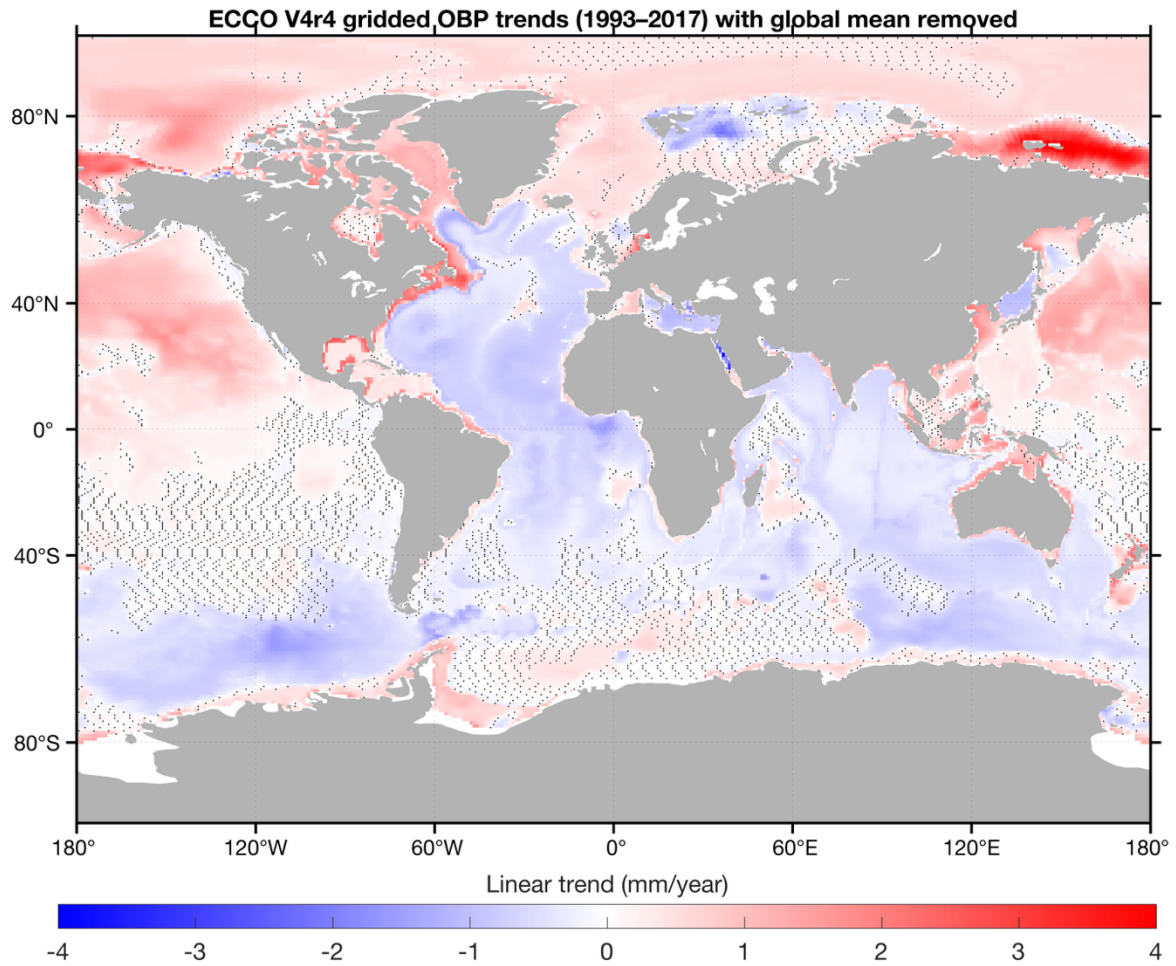

**Supplementary Fig. 1 | Linear trends of ECCO ocean bottom pressure (OBP) after removal of the area-weighted global mean over 1993–2017. Dots mark regions where the trend is not statistically significant at the 95% confidence level.**

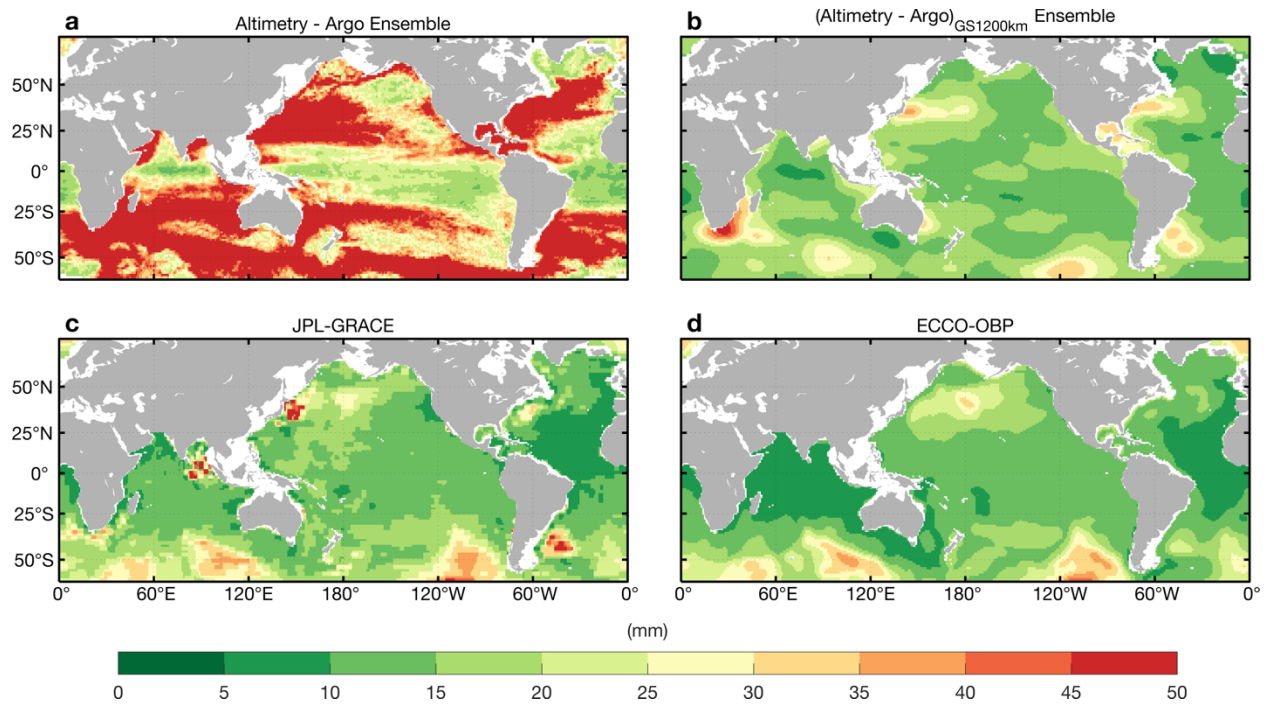

**Supplementary Fig. 2 | Spatial patterns of variability in sea-level budget terms.** Shown are the standard deviations of **a**, the residual term computed as altimetry minus Argo upper-ocean steric sea level (Altimetry–Argo); **b**, the same residual after Gaussian spatial smoothing; **c**, GRACE/GRACE-FO ocean bottom pressure (OBP) from the JPL mascon product; and **d** OBP from ECCO. The localized extrema in **c** over the Cocos Basin and the northwest Pacific reflect earthquake-related mass redistribution signals.

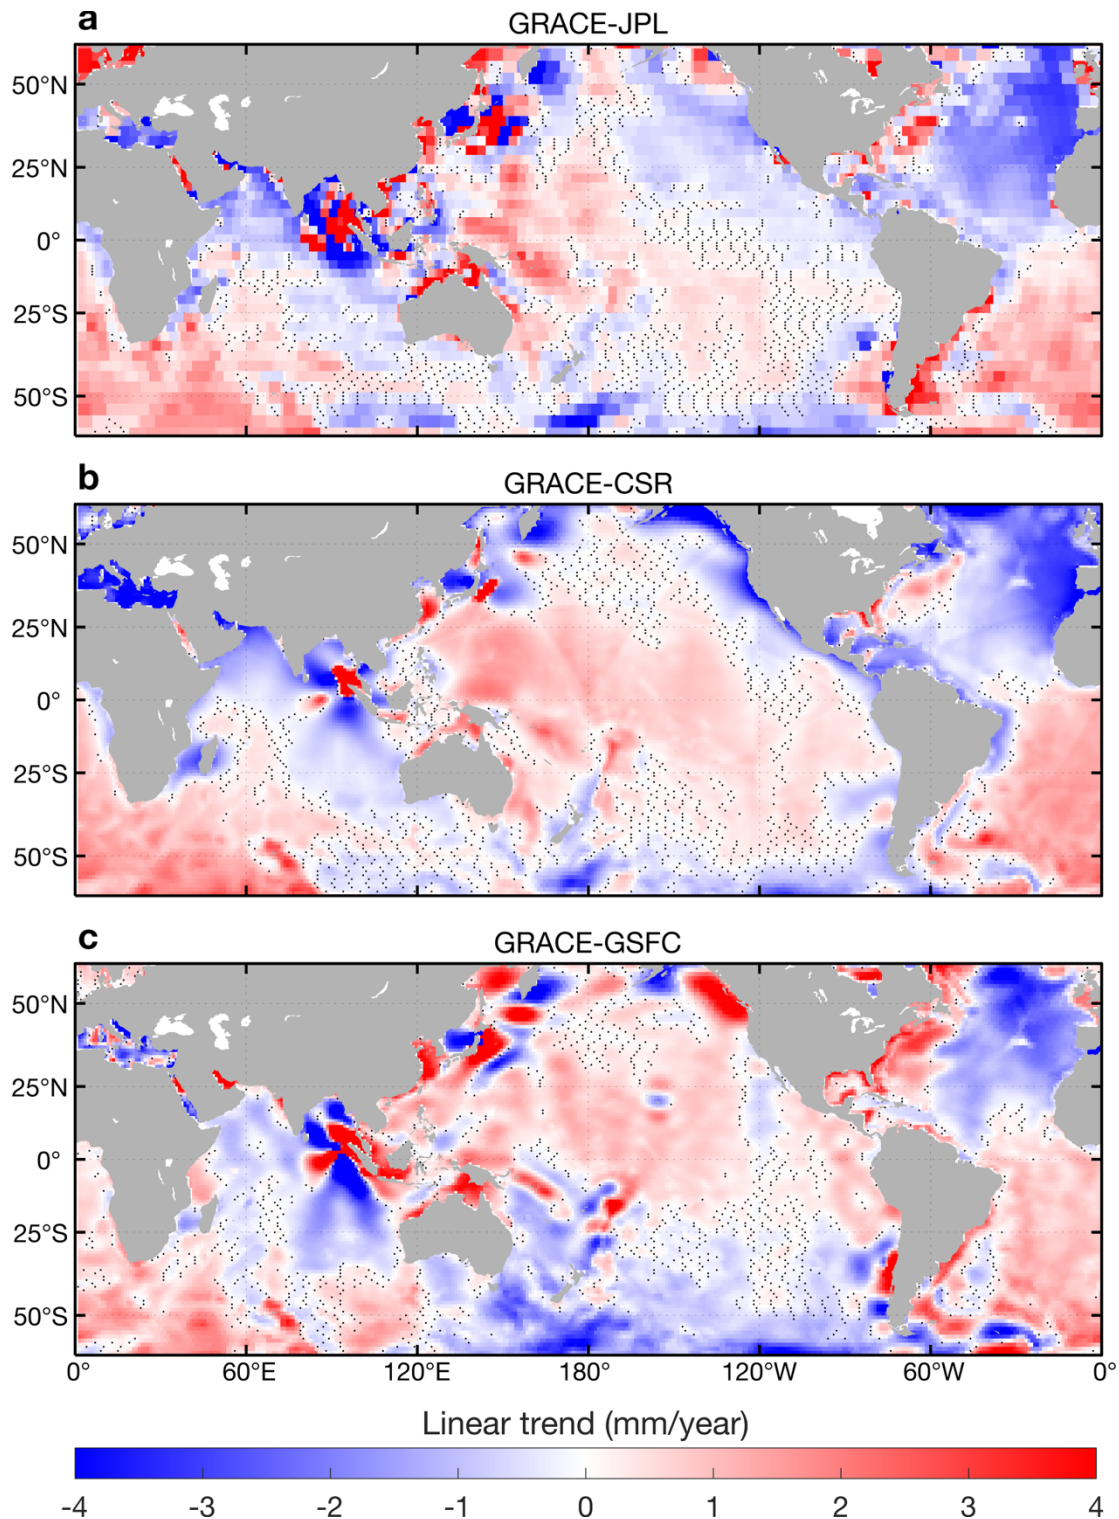

**Supplementary Fig. 3 | Linear trends of GRACE/GRACE-FO ocean bottom pressure (OBP) across three mascon solutions after removal of the area-weighted global mean over 2005–2022. a, JPL; b, CSR; and c, GSFC. Dots mark regions where the trend is not statistically significant at the 95% confidence level.**
